# Supplementary material for: Advances in heterocycles as DNA intercalating cancer drugs
Source: publisher site journal article supplement (doi:10.1515/psr-2021-0065), 2022-01-04
Supplement: Supplementary file 1 [file j_psr-2021-0065_suppl_010.pdf]

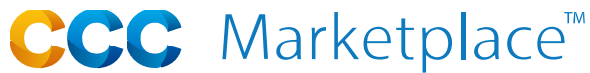

## Order Confirmation

Thank you, your order has been placed. An email confirmation has been sent to you. Your order license details and printable licenses will be available within 24 hours. Please access Manage Account for final order details.

This is not an invoice. Please go to manage account to access your order history and invoices.

### CUSTOMER INFORMATION

Payment by invoice: You can cancel your order until the invoice is generated by contacting customer service.

#### Billing Address

Dr. Aparna Das  
Prince Mohammad Bin Fahd University  
PRINCE MOHAMMAD BIN FAHD UNIVERSITY  
Al Khobar, Eastern Province 31952  
Saudi Arabia  
  
+966 3186665  
aparnadasam@gmail.com

#### Customer Location

Dr. Aparna Das  
Prince Mohammad Bin Fahd University  
PRINCE MOHAMMAD BIN FAHD UNIVERSITY  
Al Khobar, Eastern Province 31952  
Saudi Arabia

#### PO Number (optional)

N/A

#### Payment options

Invoice

### PENDING ORDER CONFIRMATION

Confirmation Number: Pending

Order Date: 29-Jul-2021

#### 1. Physical chemistry chemical physics : PCCP

0.00 USD

Article: Intercalation and de-intercalation pathway of proflavine through the minor and major grooves of DNA: roles of water and entropy.

|                  |                     |           |                            |
|------------------|---------------------|-----------|----------------------------|
| Order License ID | Pending             | Publisher | ROYAL SOCIETY OF CHEMISTRY |
| ISSN             | 1463-9076           |           |                            |
| Type of Use      | Republish in a book | Portion   | Chart/graph/table/figure   |

#### LICENSED CONTENT

|                   |                                            |                  |                            |
|-------------------|--------------------------------------------|------------------|----------------------------|
| Publication Title | Physical chemistry chemical physics : PCCP | Rightsholder     | Royal Society of Chemistry |
|                   |                                            | Publication Type | Journal                    |
|                   |                                            | Start Page       | 6446                       |

|               |                                                                                                                                                                              |          |      |
|---------------|------------------------------------------------------------------------------------------------------------------------------------------------------------------------------|----------|------|
| Article Title | Intercalation and de-intercalation pathway of proflavine through the minor and major grooves of DNA: roles of water and entropy.                                             | End Page | 6455 |
|               |                                                                                                                                                                              | Issue    | 17   |
|               |                                                                                                                                                                              | Volume   | 15   |
| Author/Editor | Royal Society of Chemistry (Great Britain), Deutsche Bunsen-Gesellschaft für Physikalische Chemie., Koninklijke Nederlandse Chemische Vereniging., Società chimica italiana. |          |      |
| Date          | 01/01/1999                                                                                                                                                                   |          |      |
| Language      | English                                                                                                                                                                      |          |      |
| Country       | United Kingdom of Great Britain and Northern Ireland                                                                                                                         |          |      |

## REQUEST DETAILS

|                                                        |                                   |                             |                                  |
|--------------------------------------------------------|-----------------------------------|-----------------------------|----------------------------------|
| Portion Type                                           | Chart/graph/table/figure          | Distribution                | Worldwide                        |
| Number of charts / graphs / tables / figures requested | 1                                 | Translation                 | Original language of publication |
| Format (select all that apply)                         | Print, Electronic                 | Copies for the disabled?    | No                               |
| Who will republish the content?                        | Publisher, STM                    | Minor editing privileges?   | No                               |
| Duration of Use                                        | Current edition and up to 5 years | Incidental promotional use? | No                               |
| Lifetime Unit Quantity                                 | Up to 499                         | Currency                    | USD                              |
| Rights Requested                                       | Main product                      |                             |                                  |

## NEW WORK DETAILS

|                           |                                                            |                                    |           |
|---------------------------|------------------------------------------------------------|------------------------------------|-----------|
| Title                     | Advances in Small Heterocycles as DNA Intercalating Agents | Available in the following markets | Worldwide |
| Author                    | Aparna Das, Bimal Krishna Banik                            | Expected size (number of pages)    | 400       |
| Publisher                 | De Bruter                                                  | Proposed price                     | N/A       |
| Publisher imprint         | N/A                                                        | Standard identifier                | N/A       |
| Expected publication date | 2021-12-30                                                 |                                    |           |

## ADDITIONAL DETAILS

|                        |     |                                                               |                                     |
|------------------------|-----|---------------------------------------------------------------|-------------------------------------|
| Order reference number | N/A | The requesting person / organization to appear on the license | Prince Mohammad Bin Fahd University |
|------------------------|-----|---------------------------------------------------------------|-------------------------------------|

## REUSE CONTENT DETAILS

|                                                           |                                       |                                                  |                                                                                                                                  |
|-----------------------------------------------------------|---------------------------------------|--------------------------------------------------|----------------------------------------------------------------------------------------------------------------------------------|
| Title, description or numeric reference of the portion(s) | Figure 1                              | Title of the article/chapter the portion is from | Intercalation and de-intercalation pathway of proflavine through the minor and major grooves of DNA: roles of water and entropy. |
| Editor of portion(s)                                      | Sasikala, Wilbee D.; Mukherjee, Arnab | Author of portion(s)                             | Sasikala, Wilbee D.; Mukherjee, Arnab                                                                                            |
| Volume of serial or monograph                             | 15                                    | Issue, if republishing an article from a serial  | 17                                                                                                                               |
| Page or page range of portion                             | 6446-6455                             | Publication date of portion                      | 2013-04-03                                                                                                                       |

2. Natural product reports

0.00 USD

Article: Natural product DNA major groove binders.

|                  |                     |           |                            |
|------------------|---------------------|-----------|----------------------------|
| Order License ID | Pending             | Publisher | Royal Society of Chemistry |
| ISSN             | 1460-4752           | Portion   | Chart/graph/table/figure   |
| Type of Use      | Republish in a book |           |                            |

LICENSED CONTENT

|                   |                                                      |                  |                                                                 |
|-------------------|------------------------------------------------------|------------------|-----------------------------------------------------------------|
| Publication Title | Natural product reports                              | Publication Type | e-Journal                                                       |
| Article Title     | Natural product DNA major groove binders.            | Start Page       | 134                                                             |
| Author/Editor     | Royal Society of Chemistry (Great Britain)           | End Page         | 143                                                             |
| Date              | 01/01/1984                                           | Issue            | 2                                                               |
| Language          | English                                              | Volume           | 29                                                              |
| Country           | United Kingdom of Great Britain and Northern Ireland | URL              | http://firstsearch.oclc.org/journal=0265-0568;screen=info;ECOIP |
| Righthsholder     | Royal Society of Chemistry                           |                  |                                                                 |

REQUEST DETAILS

|                                                        |                          |                             |                                  |
|--------------------------------------------------------|--------------------------|-----------------------------|----------------------------------|
| Portion Type                                           | Chart/graph/table/figure | Distribution                | Worldwide                        |
| Number of charts / graphs / tables / figures requested | 1                        | Translation                 | Original language of publication |
| Format (select all that apply)                         | Print, Electronic        | Copies for the disabled?    | No                               |
| Who will republish the content?                        | Publisher, STM           | Minor editing privileges?   | No                               |
| Duration of Use                                        | Life of current edition  | Incidental promotional use? | No                               |
| Lifetime Unit Quantity                                 | Up to 499                | Currency                    | USD                              |
| Rights Requested                                       | Main product             |                             |                                  |

NEW WORK DETAILS

|                           |                                     |                                    |           |
|---------------------------|-------------------------------------|------------------------------------|-----------|
| Title                     | Heterocyclic Anticancer agents      | Available in the following markets | worldwide |
| Author                    | Bimal Krishna Banik, Bubun Banerjee | Expected size (number of pages)    | 400       |
| Publisher                 | De Gruyter                          | Proposed price                     | N/A       |
| Publisher imprint         | N/A                                 | Standard identifier                | N/A       |
| Expected publication date | 2021-09-30                          |                                    |           |

## ADDITIONAL DETAILS

|                        |     |                                                               |                     |
|------------------------|-----|---------------------------------------------------------------|---------------------|
| Order reference number | N/A | The requesting person / organization to appear on the license | Bimal Krishna Banik |
|------------------------|-----|---------------------------------------------------------------|---------------------|

## REUSE CONTENT DETAILS

|                                                           |                                  |                                                  |                                           |
|-----------------------------------------------------------|----------------------------------|--------------------------------------------------|-------------------------------------------|
| Title, description or numeric reference of the portion(s) | Figure 1                         | Title of the article/chapter the portion is from | Natural product DNA major groove binders. |
| Editor of portion(s)                                      | Hamilton, Paris L.; Arya, Dev P. | Author of portion(s)                             | Hamilton, Paris L.; Arya, Dev P.          |
| Volume of serial or monograph                             | 29                               | Issue, if republishing an article from a serial  | 2                                         |
| Page or page range of portion                             | 134-143                          | Publication date of portion                      | 2012-01-17                                |

---

**Total Items: 2****Total Due: 0.00 USD**

---

Accepted: All Publisher and CCC Terms and Conditions
